# Supplementary material for: Intracellular targeting of ascomycetous catalase-peroxidases (KatG1s)
Source: PubMed Central journal article supplement (PMC3668122; doi:10.1007/s00203-013-0887-5), 2013-04-16

# *Ch. globosum* cDNA from PQ sample

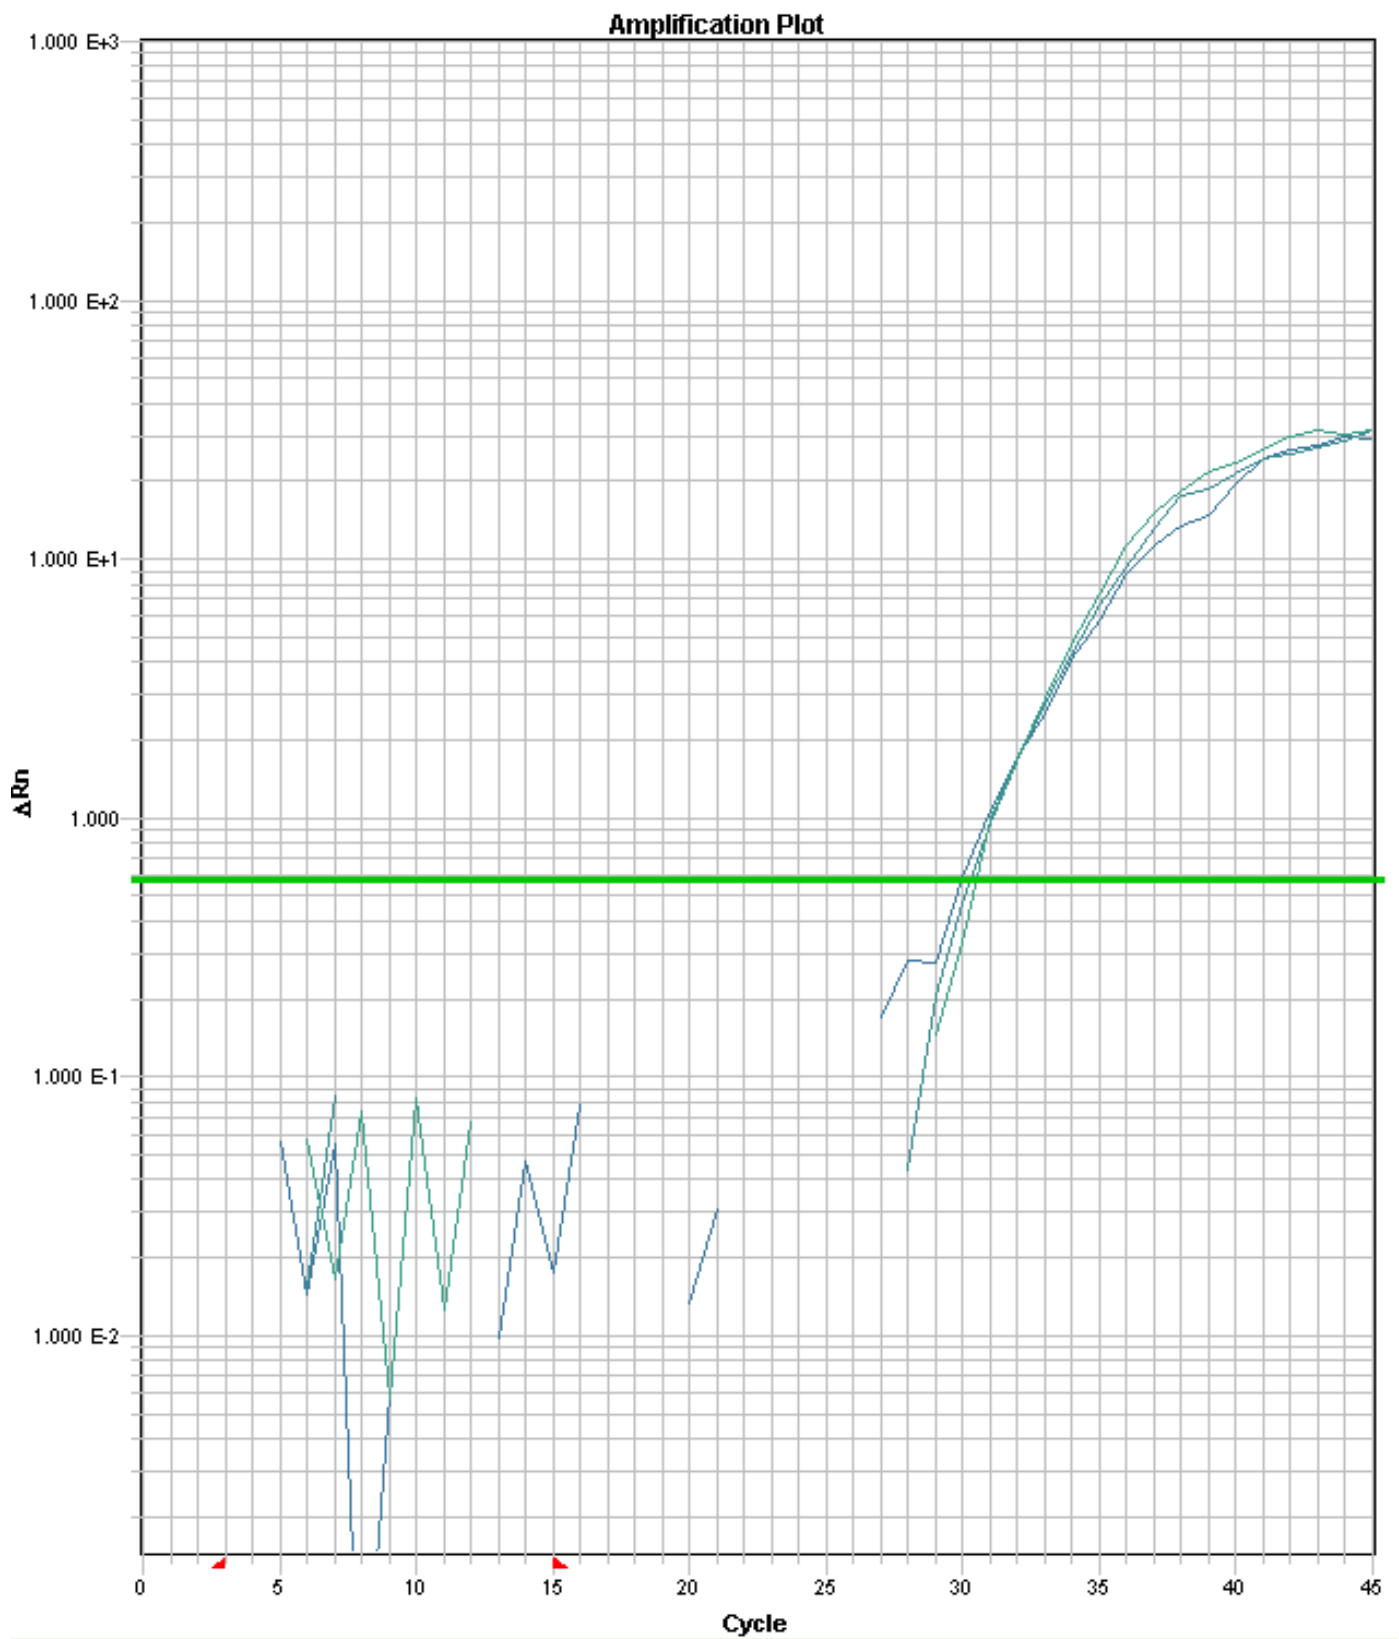

Supplement: 203_2013_887_MOESM1_ESM.pdf [file 203_2013_887_MOESM1_ESM.pdf]
